# Supplementary material for: Consumer Use of “Dr Google”: A Survey on Health Information-Seeking Behaviors and Navigational Needs
Source: PubMed Central journal article supplement (PMC4710847; doi:10.2196/jmir.4345), 2015-12-29
Supplement: jmir_v17i12e288_app1.pdf [file jmir_v17i12e288_app1.pdf]

**Multimedia Appendix 1.** Reported chronic health conditions (N=400).

| Health condition                                                                                        | No navigational needs (N=195)<br>n (%) <sup>a</sup> | Navigational needs (N=205)<br>n (%) <sup>a</sup> | Total<br>n (%) <sup>a</sup> |
|---------------------------------------------------------------------------------------------------------|-----------------------------------------------------|--------------------------------------------------|-----------------------------|
| Heart and vascular condition (eg, high blood pressure, stroke, heart failure, angina, high cholesterol) | 58 (29.7)                                           | 61 (29.8)                                        | 119 (29.8)                  |
| Skin condition (eg, eczema, psoriasis)                                                                  | 45 (23.1)                                           | 59 (28.8)                                        | 104 (26.0)                  |
| Mental health (eg, depression)                                                                          | 50 (25.6)                                           | 52 (25.4)                                        | 102 (25.5)                  |
| Lung condition (eg, asthma, COPD, emphysema)                                                            | 50 (25.6)                                           | 41 (20.1)                                        | 91 (22.8)                   |
| Stomach or bowel condition (eg, irritable bowel syndrome, Crohn's disease, ulcerative colitis, reflux)  | 44 (22.6)                                           | 37 (18.0)                                        | 81 (20.3)                   |
| Arthritis and/or osteoporosis                                                                           | 39 (20.0)                                           | 35 (17.1)                                        | 74 (18.5)                   |
| Diabetes (Type 1 or Type 2)                                                                             | 24 (12.3)                                           | 28 (13.7)                                        | 52 (13.0)                   |
| Thyroid condition                                                                                       | 14 (7.2)                                            | 17 (8.3)                                         | 31 (7.8)                    |
| Kidney disease                                                                                          | 7 (3.6)                                             | 3 (1.5)                                          | 10 (2.5)                    |
| Cancer – not related to any of the above conditions                                                     | 6 (3.1)                                             | 13 (6.3)                                         | 19 (4.8)                    |
| Other                                                                                                   | 43 (22.1)                                           | 54 (26.3)                                        | 97 (24.3)                   |

<sup>a</sup>Respondents could select multiple options; percentages do not total 100%.
