# Supplementary material for: Consumer Use of “Dr Google”: A Survey on Health Information-Seeking Behaviors and Navigational Needs
Source: PubMed Central journal article supplement (PMC4710847; doi:10.2196/jmir.4345), 2015-12-29
Supplement: jmir_v17i12e288_app2.pdf [file jmir_v17i12e288_app2.pdf]

**Multimedia Appendix 2.** Health information sought (N=400).

| Category of health information                                                         | No navigational needs (N=195)<br>n (%) <sup>a</sup> | Navigational needs (N=205)<br>n (%) <sup>a</sup> | Total<br>n (%) <sup>a</sup> |
|----------------------------------------------------------------------------------------|-----------------------------------------------------|--------------------------------------------------|-----------------------------|
| Information about medical conditions                                                   | 173 (88.7)                                          | 184 (89.8)                                       | 357 (89.3)                  |
| Information about medicines or medical devices                                         | 136 (69.7)                                          | 139 (67.8)                                       | 275 (68.8)                  |
| Information about diets                                                                | 109 (55.9)                                          | 123 (60.0)                                       | 232 (58.0)                  |
| Medical terms or jargon                                                                | 110 (56.4)                                          | 121 (59.0)                                       | 231 (57.8)                  |
| Information about natural products (eg, herbal products, vitamin supplements)          | 107 (54.9)                                          | 124 (60.5)                                       | 231 (57.8)                  |
| Information about health professionals, clinics or hospitals                           | 105 (53.8)                                          | 118 (57.6)                                       | 223 (55.8)                  |
| Information about exercise(s)                                                          | 98 (50.3)                                           | 123 (60.0)                                       | 221 (55.3)                  |
| Information about associations or societies (eg, Diabetes Association, Cancer Council) | 63 (32.3)                                           | 84 (41.0)                                        | 147 (36.8)                  |
| Other                                                                                  | 10 (5.1)                                            | 8 (3.9)                                          | 18 (4.5)                    |

<sup>a</sup>Respondents could select multiple options; percentages do not total 100%.
