# Supplementary material for: Consumer Use of “Dr Google”: A Survey on Health Information-Seeking Behaviors and Navigational Needs
Source: PubMed Central journal article supplement (PMC4710847; doi:10.2196/jmir.4345), 2015-12-29
Supplement: jmir_v17i12e288_app4.pdf [file jmir_v17i12e288_app4.pdf]

**Multimedia Appendix 4.** Action(s) taken upon finding web-based health information (N=400).

| Action                                                                       | No Navigational Needs (N=195)<br>n (%) <sup>a</sup> | Navigational Needs (N=205)<br>n (%) <sup>a</sup> | Total<br>n (%) <sup>a</sup> |
|------------------------------------------------------------------------------|-----------------------------------------------------|--------------------------------------------------|-----------------------------|
| I use the information to decide whether I need to see a health professional  | 110 (56.4)                                          | 123 (60.0)                                       | 233 (58.3)                  |
| I use the information to change my diet or exercise                          | 95 (48.7)                                           | 113 (55.1)                                       | 208 (52.0)                  |
| I discuss the information with a health professional                         | 97 (49.7)                                           | 110 (53.7)                                       | 207 (51.8)                  |
| I use the information to decide whether to buy a medicine or natural product | 80 (41.0)                                           | 94 (45.9)                                        | 174 (43.5)                  |
| Other                                                                        | 16 (8.2)                                            | 9 (4.4)                                          | 25 (6.3)                    |

<sup>a</sup>Respondents could select multiple options; percentages do not total 100%.
